# Supplementary material for: Prognostic Significance of Alternative Splicing Genes in Cervical Squamous Cell Carcinoma and Endocervical Adenocarcinoma
Source: Research Square preprint supplement (doi:10.21203/rs.3.rs-121117/v1), 2020-12-08
Supplement: Supplementary file 1 [file 3fe94460c7e2315d807b7129.XLSX]

## Sheet: TABLES1
Table S1 402 genes of Survival‐associated AS events from univariate Cox regression analysis.
id	z	HR	HR.95L	HR.95H	pvalue
FCF1|28425|AD	5.04667	1508.57	87.9254	25883.2	4.49569e-07
C1QTNF1|43985|AP	4.71515	64.6838	11.4313	366.013	2.41537e-06
FOXRED2|62052|AP	4.34342	139.264	15.0118	1291.94	1.40284e-05
MFSD12|46693|AP	-4.18602	0.0392461	0.00861765	0.178732	2.83883e-05
TBC1D22A|62728|ES	-4.07496	1.64435e-12	3.53304e-18	7.65317e-07	4.6023e-05
ECE1|963|AP	4.04353	332.073	19.9137	5537.54	5.26526e-05
NPDC1|88261|AP	3.93161	33.6654	5.83257	194.316	8.43803e-05
SLC39A6|45210|ES	-3.83774	6.47966e-07	4.47782e-10	0.000937644	0.00012417
GEMIN7|50397|ES	3.82317	306.503	16.2837	5769.22	0.000131747
ACSS1|58860|AT	-3.79772	0.00024616	3.37881e-06	0.0179338	0.000146033
SLC25A3|23859|RI	-3.66097	0.0022954	8.87046e-05	0.0593978	0.000251266
MCC|73004|AP	-3.63816	0.103761	0.0306158	0.351658	0.000274597
GEMIN4|38259|AP	-3.59019	0.0687686	0.0159477	0.29654	0.000330432
HGSNAT|83760|AP	-3.55399	4.33508e-10	2.97481e-15	6.31735e-05	0.000379437
WTAP|78310|AP	-3.4461	0.033456	0.00484474	0.231035	0.000568746
SRSF2|43667|AD	3.38532	14581	56.6397	3.75364e+06	0.000710956
SLC16A5|43347|AP	3.3844	39.2567	4.68652	328.833	0.00071334
ENTPD6|58863|AA	-3.35688	0.00128826	2.64629e-05	0.062715	0.000788274
DYX1C1|30732|AT	3.34212	1257.69	19.136	82660.5	0.000831408
LTBP3|16862|AP	3.33432	13.9538	2.96363	65.6994	0.000855093
TNNI1|9376|AT	-3.31163	9.46352e-05	3.93107e-07	0.0227822	0.000927533
ZCCHC4|68961|AT	3.30881	2859.89	25.6443	318939	0.000936934
STK25|58383|AP	-3.30691	0.0212589	0.00216919	0.208346	0.000943299
AP2M1|67841|ES	3.29738	126.477	7.12157	2246.18	0.0009759
SLC6A9|2538|AT	3.28954	8030.02	37.8635	1.70299e+06	0.00100351
HNRNPK|86708|AP	3.24466	36375.5	63.9457	2.06922e+07	0.00117593
CAMKK2|24848|AP	3.23842	13.3329	2.78032	63.9374	0.00120195
LEMD2|75766|AP	3.22558	9.24676	2.39344	35.7236	0.0012572
MAP7D1|1756|AP	-3.18794	0.0195001	0.00173277	0.219449	0.00143292
NEIL2|82632|RI	3.18538	17.7279	3.02245	103.982	0.00144564
PREPL|53429|AP	3.18011	11.8654	2.58334	54.4988	0.00147221
ZFHX3|37558|AP	3.14847	27.1059	3.47507	211.429	0.00164126
GAPVD1|87563|AT	-3.14631	2.21114e-16	3.91063e-26	1.25022e-06	0.00165344
MMS19|12716|ES	3.13848	6.07621e+07	837.144	4.41027e+12	0.00169825
COMMD5|85672|AP	-3.12487	0.000204152	9.89694e-07	0.042112	0.00177885
UBE2J2|48|ES	3.10467	10484.8	30.3669	3.62006e+06	0.0019049
ZCCHC9|72670|AD	3.09688	380.46	8.85677	16343.4	0.00195568
ERBB2IP|72262|ES	-3.08686	0.101955	0.0239226	0.434516	0.0020228
RPL23|94524|AA	-3.07829	0.0599545	0.00999204	0.35974	0.00208192
DAPL1|55686|AT	3.07437	3.81785	1.62517	8.9689	0.00210948
NT5DC2|65224|AP	-3.07391	0.0653159	0.0114673	0.37203	0.00211272
SLC39A6|45211|AD	3.06855	1335.98	13.4668	132536	0.00215104
MXRA7|43610|AP	-3.0595	0.0223812	0.00196243	0.255254	0.00221705
GFER|33180|AP	-3.05716	0.0210741	0.00177457	0.250267	0.00223444
CAMKK2|24845|AP	-3.05028	0.0722324	0.0133477	0.390892	0.00228631
FAM115A|82126|AD	3.04658	192.353	6.52627	5669.32	0.00231458
DTNB|52868|ES	-3.04618	0.000130093	4.1125e-07	0.0411534	0.00231765
OSGEPL1|56531|ES	-3.04538	1.48783e-11	1.60018e-18	0.000138336	0.00232383
DLD|81376|AT	-3.04351	0.000787893	7.90401e-06	0.0785392	0.00233838
DLD|81377|AT	3.04323	1268.22	12.7236	126409	0.00234054
AMMECR1|89875|AP	-3.04027	1.11335e-26	2.06695e-43	5.99695e-10	0.00236366
TFAP2C|59883|AP	-3.0392	0.00306978	7.35457e-05	0.128132	0.00237206
ESR2|27867|AT	3.00635	390.141	7.97806	19078.5	0.00264404
PBX1|8787|AT	-3.00525	1.59887e-07	5.90842e-12	0.00432667	0.00265365
HGF|80248|AT	3.00331	8.23368	2.08007	32.592	0.00267056
NTPCR|10317|AT	-2.99604	0.00122352	1.52184e-05	0.0983676	0.00273511
YAF2|21209|ES	-2.99078	1.07632e-07	2.92092e-12	0.00396608	0.00278269
KSR1|39847|AP	2.96965	51.3249	3.81517	690.467	0.00298141
GLT8D2|24090|AT	-2.96399	1.29499e-11	8.17824e-19	0.000205057	0.00303678
CNOT2|23374|ES	-2.95818	2.23483e-07	8.76469e-12	0.00569839	0.00309462
GBA|8042|ES	2.94045	1.27056e+18	1.08823e+06	1.48344e+30	0.00327739
GATAD2A|48635|AA	-2.93704	2.93726e-05	2.77706e-08	0.0310672	0.00331359
H3F3A|10005|AP	2.93048	10.8535	2.20272	53.4782	0.00338435
PDK1|55972|AP	-2.92446	0.0889404	0.0175707	0.450204	0.00345053
RAB34|39954|AP	-2.91608	0.00895029	0.000376027	0.213037	0.00354464
RAB34|39953|AP	2.91598	111.71	4.69326	2658.93	0.00354574
PPP1R7|58335|ES	2.90558	3.79924e+07	292.952	4.92716e+12	0.00366575
PGAM5|25293|AT	-2.90451	3.96288e-11	3.79088e-18	0.000414269	0.00367832
ENAH|9992|AA	-2.90197	0.0022701	3.7183e-05	0.138595	0.00370821
AK3|85777|ES	-2.89256	4.8264e-13	2.17869e-21	0.000106918	0.00382116
SHC1|7855|AP	2.88572	6.15223	1.79112	21.1319	0.00390524
TMUB1|82345|AP	2.88528	31.1126	3.01153	321.43	0.0039107
UBA52|48478|AD	2.88221	16.8967	2.47099	115.54	0.00394895
PIGT|59553|AD	-2.87371	0.090092	0.0174481	0.465184	0.00405683
CAPRIN1|14941|AP	2.85462	12.8184	2.22434	73.8695	0.00430886
NDE1|34184|AT	2.85027	18.2156	2.47577	134.022	0.00436819
SULT1A1|35814|AP	2.84914	612.761	7.411	50664.7	0.0043837
FAM76A|1344|ES	-2.84063	0.086368	0.015939	0.467998	0.00450251
NKIRAS2|40976|AP	2.83686	1.06105e+06	72.8791	1.5448e+10	0.00455596
DNAJC12|11904|ES	-2.83505	0.247884	0.0945092	0.650167	0.00458184
PPAN|47459|AP	2.83348	116.583	4.33618	3134.45	0.00460448
ANKRD54|62161|AP	2.81881	8.29252	1.90506	36.0965	0.00482026
ZNF395|83211|AP	2.80873	18.8756	2.42975	146.635	0.00497377
C4orf36|69840|AT	-2.80421	0.0118101	0.000530735	0.2628	0.00504403
CUL7|76216|AP	2.79856	12.464	2.12968	72.9455	0.00513317
TMEM51|739|ES	2.78445	13.7265	2.17188	86.753	0.00536181
WNT7B|62673|AP	-2.78115	0.0150348	0.000780622	0.28957	0.00541663
CAPG|54271|AP	2.78022	85.3382	3.71322	1961.27	0.00543223
TRADD|36927|AP	-2.77779	0.0211513	0.00139227	0.32133	0.00547296
CHEK1|19309|AP	2.77169	11.1498	2.0263	61.3518	0.00557668
NNT|71963|AP	-2.77074	0.0676683	0.0100699	0.454723	0.00559291
CHRNB1|38960|AP	2.76186	11.9335	2.05417	69.3265	0.00574725
RGS19|60190|AP	-2.76029	0.0750973	0.0119469	0.472057	0.00577494
THAP8|49333|ES	-2.75725	0.00438762	9.25197e-05	0.208077	0.00582889
KANK3|47222|AT	-2.7403	0.0661057	0.00947179	0.461367	0.00613822
CABYR|44862|ES	-2.73385	0.00397844	7.56637e-05	0.209188	0.00625985
TMEM150A|54299|AP	-2.73231	0.0709494	0.0106341	0.473366	0.00628925
RNF166|38013|AP	-2.73081	0.0798363	0.0130102	0.48991	0.00631793
S100PBP|1637|AA	-2.7258	0.0175098	0.000955273	0.32095	0.00641464
CDK10|38109|AP	-2.72361	0.00365067	6.42999e-05	0.207269	0.00645719
CSF2RA|88369|ES	2.72361	7.84624	1.78174	34.5524	0.00645736
POMZP3|80186|ES	-2.71801	1.62427e-05	5.71547e-09	0.0461597	0.00656755
MTIF2|53607|ES	-2.71371	0.0516212	0.00606978	0.439019	0.00665351
TSPO|62571|AP	2.70569	7.18644e+07	146.338	3.52914e+13	0.00681633
ACOT7|390|AP	-2.69846	0.00061826	2.88743e-06	0.132383	0.00696613
TROVE2|9250|AP	2.69818	11.2925	1.94108	65.696	0.00697188
TLE3|31411|AD	-2.69647	0.0067243	0.000177274	0.255063	0.00700781
YJEFN3|48656|AT	2.69594	8.6988	1.80495	41.923	0.00701908
STAMBPL1|12468|AP	2.6903	12.8372	1.99948	82.4182	0.00713879
ENTPD1|12653|AP	2.67805	19.6623	2.22266	173.938	0.00740515
GALNT4|23640|AP	2.67745	42.3202	2.72816	656.487	0.00741858
MED4|25852|AD	2.67497	225.313	4.25488	11931.2	0.0074736
CHCHD3|81833|AT	-2.67467	0.0105919	0.000378179	0.296652	0.0074803
AMDHD2|33282|RI	-2.67097	0.0242303	0.00158051	0.371468	0.00756328
TUBB3|38166|AP	-2.66858	0.00383122	6.43271e-05	0.228182	0.00761734
YY1AP1|8095|AP	-2.66753	0.0355432	0.00306146	0.412654	0.00764108
ZNF384|19923|ES	-2.66624	0.0162252	0.000784323	0.33565	0.0076705
HEATR1|10395|AT	-2.66123	1.77242e-10	1.16616e-17	0.00269387	0.00778554
S100A2|91124|ES	2.66075	26.55	2.37174	297.208	0.00779678
KDM2B|24876|AT	-2.65141	0.00011016	1.30685e-07	0.0928584	0.00801562
SLC50A1|7944|ES	2.6504	764.767	5.63852	103727	0.0080397
CEP135|69337|AT	2.64252	5307.91	9.16504	3.07406e+06	0.00822924
TC2N|28884|AP	2.63931	23.5968	2.25615	246.797	0.0083074
C2CD5|20733|ES	2.63618	17.5434	2.08512	147.604	0.0083846
RBM6|64945|ES	-2.63521	0.00690249	0.000170507	0.279427	0.00840859
TMLHE|90682|AT	2.63516	40.6354	2.5837	639.098	0.0084098
DENND2D|4141|AP	-2.63189	0.0550625	0.00635585	0.477022	0.00849116
ZNF638|53927|AP	2.62121	85.3885	3.07063	2374.5	0.00876193
GABPB1|30577|ES	-2.61825	6.16835e-10	7.86866e-17	0.00483545	0.00883812
USP48|995|AP	2.61646	8.46137	1.70885	41.8964	0.00888463
FUT8|28010|AP	2.59549	7.27007	1.62538	32.5178	0.00944554
TRIP10|47083|ES	-2.59354	0.0581473	0.00677444	0.499098	0.00949925
DPM1|59794|ES	-2.59309	3.12991e-09	1.1682e-15	0.00838583	0.00951165
ZNF7|85657|AT	2.58465	346.306	4.10926	29184.8	0.00974779
MAX|27960|ES	-2.58136	0.000536717	1.76491e-06	0.163218	0.00984114
NFX1|86101|AT	-2.57267	0.0121096	0.000419544	0.349525	0.0100917
ZNF606|52383|AD	2.5722	5.87386	1.52412	22.6375	0.0101056
ZNF33A|11308|AT	2.57012	39.3514	2.39138	647.546	0.0101663
CXADR|60227|AT	2.56567	32.2608	2.27075	458.332	0.0102977
TMEM62|30209|AP	2.56552	7.75506	1.62172	37.0847	0.010302
CD96|66049|AT	-2.56442	0.0382245	0.00315381	0.463284	0.0103349
NGLY1|63751|AP	-2.55725	0.0364516	0.00287983	0.461389	0.0105504
YLPM1|28426|AT	2.55685	940162	24.7984	3.56437e+10	0.0105624
ASH2L|83368|AP	-2.55625	0.0112592	0.00036102	0.351142	0.0105807
GOLGA7|83513|AA	2.55309	1349.15	5.33541	341154	0.0106771
C11orf48|16384|AP	-2.55308	0.000330371	7.02574e-07	0.15535	0.0106774
NARF|44391|AP	2.54557	273.484	3.63594	20570.7	0.0109098
SH3BP1|62136|RI	-2.53938	6.98938e-12	1.71506e-20	0.00284838	0.0111048
TNFSF12|38966|AT	-2.53889	0.0168878	0.000723268	0.394318	0.0111205
HECTD3|2592|RI	-2.53358	5.98554e-05	3.23813e-08	0.11064	0.0112904
ZZZ3|3526|AP	-2.52994	0.108582	0.0194427	0.606405	0.0114081
EML3|16359|AP	2.5275	6.84842	1.54037	30.4477	0.0114879
PLIN2|85960|AT	-2.52718	1.3806e-05	2.34926e-09	0.081134	0.0114982
HPSE|69782|ES	2.52515	4.50375e+44	9.87331e+09	2.05441e+79	0.0115649
PPP1R21|53521|AP	-2.52339	0.00121244	6.58388e-06	0.223273	0.011623
ENO3|38620|AT	-2.51708	0.0531162	0.00540264	0.522213	0.0118331
NF2|61661|ES	-2.51379	0.0143508	0.000524589	0.392585	0.0119443
TNFRSF13B|39449|AT	-2.51345	0.207733	0.0609959	0.70747	0.0119557
TBC1D1|69014|AT	-2.5071	0.00271545	2.67739e-05	0.275406	0.0121725
KIAA0226|68302|AP	-2.49935	0.189537	0.0514361	0.698422	0.012442
PLEKHB2|55368|AP	2.49702	10.885	1.6711	70.9017	0.012524
LRFN4|17140|AP	-2.49495	0.00556748	9.43431e-05	0.328554	0.0125975
LY6E|85377|AA	-2.48937	0.0572998	0.00603126	0.544376	0.0127968
TM9SF1|26891|AP	-2.48347	0.0386341	0.00296347	0.503663	0.013011
C11orf30|17890|AT	2.48021	399.125	3.51241	45353.8	0.0131305
LSP1|13865|AP	-2.47998	0.0630365	0.007094	0.560135	0.0131391
UBXN2A|52795|AP	-2.47919	0.0784779	0.0104948	0.586843	0.013168
MRPL23|13894|AT	2.47413	37.4412	2.12309	660.285	0.0133561
PAM|72902|ES	2.47227	39.8983	2.14661	741.578	0.0134257
CEP57L1|77169|AA	2.47169	252.398	3.14279	20270.1	0.0134476
IPO11|72188|AP	2.4714	220.353	3.05412	15898.3	0.0134586
PLAC8|69771|AP	-2.47092	0.199965	0.0557777	0.716878	0.0134765
AFMID|43807|ES	-2.46899	0.000237047	3.14096e-07	0.178898	0.0135495
CXCL12|11343|AT	-2.46721	0.228516	0.0707355	0.738237	0.013617
SLC35A2|89036|AA	2.46501	245.136	3.08714	19465.2	0.0137009
CYB561A3|16158|AP	2.46294	1.93064e+08	49.2143	757377383232953	0.0137802
PBX3|87588|AP	-2.46231	0.000742643	2.39866e-06	0.229928	0.0138044
RIPK1|75164|ES	-2.4619	6.51105e-07	7.73725e-12	0.0547918	0.0138203
NCKIPSD|64733|AA	2.46051	21.1886	1.8611	241.231	0.013874
STOML1|31621|ES	-2.45701	0.0303524	0.00186825	0.49312	0.0140099
SMEK1|28882|RI	2.45604	20.1836	1.8348	222.03	0.0140476
ARMC6|48567|ES	-2.45302	0.0164062	0.000614891	0.437743	0.0141664
ARHGAP9|22584|AP	2.45184	26.0473	1.92319	352.78	0.0142129
EPN1|52139|ES	2.45127	2.25698e+11	188.622	2.70062e+20	0.0142352
ARFGAP2|15642|ES	2.44967	58.9794	2.2593	1539.66	0.0142988
KCTD10|24290|AP	-2.44663	0.0367057	0.00259993	0.518209	0.0144197
TMEM205|47661|ES	-2.44661	0.000682173	1.98403e-06	0.234553	0.0144206
PIGQ|32900|AP	2.44259	30.0627	1.95902	461.337	0.0145824
NPIPB5|35571|AD	2.44169	29.0616	1.94403	434.448	0.0146186
TUBGCP2|13529|AP	2.43872	14.2971	1.68575	121.256	0.0147394
TFG|65836|AD	2.43503	74.2251	2.31708	2377.72	0.0148904
NAE1|36875|ES	2.42955	3.79887e+06	18.6949	7.71944e+11	0.0151176
ASAH1|82844|AP	-2.42846	0.000658119	1.78e-06	0.243326	0.015163
FBLIM1|773|AT	-2.42669	0.00349803	3.63117e-05	0.336978	0.0152372
COX15|12777|AT	-2.42319	0.0032977	3.24227e-05	0.335408	0.0153849
STX5|16450|AA	-2.41823	3.7904e-05	9.89061e-09	0.14526	0.0155964
TECR|564144|ES	-2.40892	2.60752e-05	4.86124e-09	0.139865	0.0159997
SEC31A|69720|AP	-2.40593	0.10114	0.0156422	0.653962	0.0161315
DMPK|50522|ES	2.4059	70.084	2.19829	2234.36	0.0161329
TLCD1|39969|AP	-2.40528	0.0286807	0.0015876	0.518129	0.0161602
FES|32501|ES	-2.39874	0.0185814	0.000715767	0.482374	0.0164518
KIAA1328|45287|AT	-2.39013	0.00152949	7.51295e-06	0.311373	0.0168422
SCO2|62849|AD	2.38728	56.0644	2.05594	1528.85	0.0169735
EMP1|20539|ES	2.38501	4404634511840	179.203	1.08261e+23	0.0170786
AAED1|86980|ES	2.38415	67.0217	2.11309	2125.76	0.0171188
EBPL|25899|AT	2.37948	1171.62	3.47572	394936	0.0173371
STK32C|13485|AP	2.37819	41.8502	1.92837	908.248	0.0173978
ERRFI1|531|AT	2.37502	2.65613e+20	3709.56	1.90185e+37	0.017548
TMUB2|41797|ES	-2.37054	0.0494034	0.00410918	0.593962	0.017762
WDR83|47821|AA	2.36801	4453.19	4.25333	4.66244e+06	0.0178839
MPV17|52961|AP	2.36767	12306.6	5.06192	2.99198e+07	0.0179003
SLC25A39|41837|AA	-2.36384	0.0173873	0.000604135	0.500417	0.0180865
IMPA1|84299|ES	2.35985	5608.73	4.31772	7.28576e+06	0.0182825
STK25|58385|AP	2.35825	15.4932	1.58856	151.104	0.0183612
AMPD2|4047|AP	2.35628	55.5752	1.96553	1571.39	0.0184592
VPS18|30060|ES	-2.3511	0.00156839	7.20248e-06	0.341527	0.0187179
GIT2|24376|ES	-2.35015	4.94074e-07	2.72004e-12	0.0897446	0.0187659
POPDC2|66348|AD	2.34761	17.4178	1.60294	189.264	0.0188944
SMCO4|18299|AP	2.34475	6.59231	1.36273	31.8908	0.0190396
TDRKH|7663|RI	-2.33733	0.112361	0.0179684	0.702618	0.0194219
TMEM106A|41699|ES	-2.33637	0.0338283	0.0019747	0.579505	0.0194721
BDKRB2|29188|AA	-2.33286	0.10078	0.0146572	0.692939	0.0196556
RAMP2|41120|AP	2.33179	106.726	2.10584	5408.97	0.0197118
RUNX2|76401|AT	-2.33119	0.0170476	0.000555807	0.522879	0.0197431
EGFL7|88188|AP	2.32999	3.23386	1.20489	8.67946	0.0198068
SCO2|62846|AP	-2.32973	0.190572	0.0472481	0.76866	0.0198205
POLM|79464|AD	2.3251	58.4934	1.89455	1805.96	0.0200668
IL32|33442|AD	-2.32264	0.00101538	3.02454e-06	0.340875	0.0201988
EIF3K|49681|ES	-2.32206	0.00013875	7.69209e-08	0.250279	0.0202295
CBX3|79041|AP	2.32201	284216	7.08496	1.14014e+10	0.0202322
FAM204A|13247|ES	2.32126	83.9528	1.99282	3536.73	0.0202729
ZC3H13|25815|AA	-2.31947	0.0339993	0.00195234	0.592085	0.0203694
NEK3|25987|AP	2.31629	12.8485	1.48109	111.46	0.0205423
GPATCH2L|28539|AP	2.31489	50.171	1.82271	1380.98	0.020619
AP4M1|80885|AP	-2.30908	0.0591511	0.00536532	0.652123	0.0209391
EP400|25233|ES	2.30837	46.1949	1.78336	1196.6	0.0209786
GMIP|48671|ES	2.30104	1.2997e+06	8.05804	2.09633e+11	0.0213895
CYB561A3|16167|ES	-2.29409	1.48808e-06	1.56309e-11	0.141668	0.0217855
DAG1|64873|AP	2.29294	12.6766	1.44602	111.13	0.0218517
NFKB2|12949|AD	-2.29146	0.0279928	0.00131447	0.596132	0.021937
ANGPT2|82578|AT	2.28904	102.927	1.94682	5441.64	0.0220769
RNASE1|26472|ES	2.28531	33834.1	4.41378	2.59358e+08	0.0222949
PAPOLG|53670|AD	2.28498	119.753	1.97522	7260.34	0.022314
ARL6IP4|25029|AD	2.28128	109.87	1.93846	6227.26	0.0225317
UCHL5|9239|AT	2.28058	108.073	1.93156	6046.77	0.0225735
ANKRD13D|17156|AP	-2.27928	0.113024	0.0173377	0.736805	0.0226502
CARD8|50710|AA	2.27714	31.7807	1.61895	623.867	0.0227776
PIP5K1A|7580|ES	-2.27569	0.00232144	1.25021e-05	0.431052	0.0228646
SSB|55881|AP	-2.26893	0.000633314	1.09336e-06	0.366837	0.0232729
SSB|55882|AP	2.26893	1579	2.726	914608	0.0232729
KANSL3|54567|AA	2.26777	13.9788	1.43046	136.605	0.0233432
GJB2|25420|AP	-2.26521	0.00355739	2.70555e-05	0.467742	0.0234998
AKT1S1|51109|AP	2.26437	91.8041	1.83602	4590.37	0.0235511
KLHDC4|37952|AA	-2.26277	0.00842886	0.000134621	0.527745	0.0236498
CUZD1|13376|AP	2.26096	17.3134	1.46172	205.071	0.0237617
HSPH1|25576|ES	-2.26088	9.90757e-06	4.54933e-10	0.215768	0.0237669
YY1AP1|8098|AP	2.25892	15.3841	1.43583	164.831	0.0238882
CHPF|57718|AP	2.2533	4986.93	3.02958	8.20887e+06	0.0242404
LGMN|29011|ES	-2.25264	0.115726	0.0177234	0.755643	0.0242821
RNF212|68450|AT	2.24288	4.53681	1.21016	17.0082	0.0249043
EMC6|38483|AD	-2.24095	0.0782643	0.00843067	0.72655	0.025029
CYP51A1|80417|AP	2.23942	466.022	2.15271	100885	0.0251288
IFT122|66727|ES	2.23906	338.126	2.06655	55323.7	0.0251521
UBE2W|84190|AT	-2.23662	3.67053e-05	4.76503e-09	0.282743	0.0253115
AURKAIP1|148|RI	-2.2316	0.0654163	0.00596391	0.717531	0.0256412
BCL6|68082|ES	2.22919	166104	4.27043	6.46086e+09	0.0258016
NME6|64633|AD	2.22542	11.8155	1.34254	103.987	0.026053
MCCC2|72445|ES	-2.2248	0.0125031	0.00026337	0.593571	0.0260947
TGFBR3|3739|AP	2.22336	7.19904	1.26345	41.0195	0.0261917
CHMP3|54441|ES	-2.21981	2.65634e-06	3.17144e-11	0.222491	0.0264315
ABL2|9103|AT	-2.2151	0.000328843	2.72365e-07	0.397033	0.0267533
FBXW7|70855|RI	2.21057	6.23376	1.23055	31.5793	0.0270658
UBAP1|86144|AP	-2.20886	2.12417e-05	1.51677e-09	0.297481	0.0271842
MTFR1|83987|ES	-2.20723	1.59175e-07	1.46324e-13	0.173154	0.0272979
ZNF680|79826|AT	-2.20536	0.00225294	1.00016e-05	0.507494	0.0274287
LRRC28|32652|ES	-2.20141	0.0525068	0.00380885	0.72383	0.0277071
SLC50A1|7941|AP	2.19468	2985.71	2.35311	3.78838e+06	0.0281869
TSPAN14|12367|AP	-2.19185	0.0985023	0.0123988	0.782551	0.0283905
PLEKHG5|462|AP	-2.19063	0.115201	0.0166626	0.796478	0.0284784
CEP57L1|77162|AD	-2.18857	0.0624523	0.00521084	0.748494	0.0286279
PAPLN|28281|ES	-2.18805	0.0411807	0.00236482	0.717119	0.0286657
CHID1|13814|ES	-2.18483	0.000629541	8.46255e-07	0.468324	0.0289011
ABLIM2|68748|AA	-2.18406	0.0872935	0.00978646	0.778642	0.0289577
RPL21|25526|AD	-2.18332	0.0201222	0.000603799	0.670596	0.0290119
ZNF419|52269|AT	-2.18296	0.00768793	9.71825e-05	0.608179	0.0290389
DNM1|87721|AT	-2.1825	0.00556448	5.25697e-05	0.588999	0.0290726
GLB1|63827|AP	-2.17956	0.0325174	0.00149328	0.708095	0.02929
NPRL3|32820|ES	-2.17493	1.03566e-08	6.60142e-16	0.16248	0.0296354
PLS3|89927|ES	-2.17285	0.159307	0.0303831	0.835295	0.0297919
EHD3|53139|ES	-2.1687	0.00408405	2.83214e-05	0.588934	0.0301053
PALLD|71133|ES	2.16844	9.89055	1.24647	78.4802	0.0301253
YIF1A|17004|AP	2.16764	4.98639e+07	5.4639	455060484034089	0.0301861
SLC35A2|89035|AT	-2.16562	0.000510067	5.34452e-07	0.486795	0.0303404
MYD88|64031|ES	2.16555	1.65002e+11	11.6125	2.34452e+21	0.0303457
NPRL3|32818|ES	-2.16524	0.000930371	1.67764e-06	0.515957	0.0303693
ZNF3|80875|AP	2.16125	1035.56	1.90902	561742	0.0306763
MZF1|52490|AD	2.1582	10.3618	1.23956	86.6165	0.0309125
SENP7|65948|ES	-2.15353	0.0948557	0.0111191	0.8092	0.0312772
H2AFY|73449|AA	-2.15212	2.27129e-06	1.64608e-11	0.313397	0.0313881
FUT10|83325|AT	-2.1496	0.00460314	3.40623e-05	0.622063	0.0315867
PLXNB3|90485|ES	-2.14536	0.123604	0.0183033	0.83471	0.031924
PCMTD2|60203|AT	2.14531	45.1521	1.38982	1466.89	0.0319278
BTD|63617|AP	2.14329	10.2278	1.22003	85.7417	0.0320902
IFIT3|12489|AP	2.14308	14.4663	1.25645	166.56	0.032107
LTBR|19846|AP	-2.13806	0.0591427	0.00442691	0.790136	0.0325119
STAT5A|41033|ES	-2.13695	0.00508079	3.9982e-05	0.645652	0.0326018
TUBB3|38167|AP	2.13687	3.52278	1.10988	11.1814	0.0326083
TNPO2|47846|AP	2.13653	7.97686	1.18722	53.5963	0.032636
AURKA|59873|AD	-2.13583	0.0701908	0.00613138	0.80353	0.0326934
PABPC1L|59491|AP	-2.13532	0.0167493	0.000392497	0.714752	0.0327353
HNRNPF|11324|AP	-2.13247	0.00125013	2.68384e-06	0.582308	0.0329679
DUOXA1|30388|RI	2.13182	102.581	1.45253	7244.57	0.0330214
USP39|54316|RI	-2.13016	0.0100544	0.000145991	0.692449	0.033158
RPL26L1|74567|AP	2.12874	181.025	1.5101	21700.5	0.0332756
P4HA3|17767|AT	2.12569	10.6808	1.2028	94.8458	0.0335291
MAX|27938|RI	-2.11942	0.137712	0.0220152	0.861432	0.0340552
CLINT1|74396|AD	-2.11816	7.32147e-13	4.32068e-24	0.124064	0.0341613
ALG9|18682|AP	-2.1179	0.182145	0.0376691	0.880741	0.0341836
UBA52|48483|AD	2.11686	27.7047	1.27914	600.05	0.0342717
TADA2B|68734|AD	2.11309	7.25584e+07	3.71227	1418194637555510	0.0345928
RGMA|32575|ES	2.1116	38371.9	2.13396	6.89987e+08	0.0347206
TMCO6|73700|RI	-2.10967	0.0572101	0.00400976	0.816255	0.0348865
FANCD2|63308|ES	2.1081	1.92829e+18	19.2704	1.92955e+35	0.0350224
RBM42|49226|ES	-2.10674	1.54917e-09	9.86239e-18	0.243341	0.0351401
PWWP2B|13500|AD	-2.1046	0.00421193	2.58354e-05	0.68667	0.0353264
SLC38A1|21321|AP	-2.10296	0.00458851	3.03626e-05	0.693431	0.0354696
RABEPK|87550|AP	2.1014	12.6959	1.18655	135.845	0.0356055
CSTF3|14884|AT	-2.09979	0.0412167	0.00210072	0.808686	0.0357477
SLC25A10|44158|AP	2.09866	32.9737	1.25988	862.987	0.0358471
NF2|61660|ES	-2.09816	0.0910343	0.00970428	0.853977	0.0358908
REV1|54714|ES	-2.09748	0.0370953	0.00170779	0.805751	0.0359511
AFMID|43817|ES	2.09192	3.96537	1.09078	14.4155	0.0364459
GRAPL|39690|AT	-2.09114	0.149546	0.025195	0.887633	0.0365154
LPAR2|48663|AP	-2.08681	0.220574	0.0533348	0.912215	0.036905
AP1G1|37491|ES	2.08115	129.862	1.32761	12702.6	0.0374199
EGLN2|50008|AP	2.08014	285106	2.06613	3.93418e+10	0.0375125
UHRF2|85821|ES	-2.07482	0.0164929	0.000341417	0.796731	0.0380028
PLEKHM1|41970|AP	-2.07157	0.0109011	0.00015159	0.78392	0.0383059
ARHGEF39|86272|AT	-2.07064	0.0944262	0.010115	0.881493	0.0383925
C19orf57|47943|ES	-2.06814	0.0653056	0.00491908	0.866996	0.0386273
HNRNPLL|53260|AT	-2.0655	0.0688506	0.00543493	0.87221	0.0388753
PIK3IP1|61842|ES	2.06407	1286.36	1.43494	1.15316e+06	0.0390107
DUSP23|8410|AP	2.06372	10.5435	1.12572	98.7502	0.0390444
ENTPD4|83081|AD	2.06323	18.0939	1.15595	283.219	0.0390907
IRAK4|21252|AD	2.06223	117.253	1.26651	10855.2	0.0391857
PDLIM7|74781|AA	-2.05675	0.0476937	0.00262489	0.866583	0.0397101
CHID1|13804|AP	2.05622	58.723	1.21004	2849.81	0.0397614
LRRC23|19997|AP	-2.05415	0.169563	0.0311888	0.921858	0.0399612
XIAP|90027|AP	-2.05301	0.0514048	0.00302292	0.874138	0.0400715
CDADC1|25880|ES	-2.05256	0.0038965	1.95002e-05	0.778594	0.0401154
PPP1CC|24497|AP	2.0511	31.3567	1.16543	843.671	0.0402572
PAQR4|33336|AP	2.0496	4.56559	1.06867	19.5053	0.0404034
PLEKHG5|466|AP	2.04913	13.113	1.1185	153.732	0.0404491
SMIM11|60477|AP	-2.04824	5.90856e-10	8.72331e-19	0.400205	0.0405369
GAS6|26397|AP	-2.04822	0.0504274	0.00289222	0.879227	0.0405388
CDK10|38120|ES	2.04664	4.05928	1.06113	15.5285	0.0406935
GINS3|36636|ES	2.04536	20.6333	1.13471	375.189	0.0408192
PPOX|8568|AT	-2.04524	0.0544568	0.00334815	0.885725	0.0408311
FIGNL1|79694|AA	-2.04484	0.289277	0.0881021	0.94982	0.0408709
NCKAP5|55400|ES	-2.04464	0.0923534	0.00941343	0.906061	0.0408908
DRG2|39549|RI	2.04432	24.116	1.14036	509.999	0.0409216
ABCD4|28376|RI	-2.04432	0.0592215	0.00394102	0.889917	0.0409222
GUK1|10178|AP	2.04384	66.1837	1.18773	3687.95	0.0409697
XBP1|61562|AP	2.041	31403.1	1.50851	6.53727e+08	0.0412508
PARP9|66440|AP	2.03702	11.4758	1.0967	120.083	0.0416485
HTATIP2|14708|AT	2.03361	43112.5	1.47174	1.26292e+09	0.0419914
SKA2|42756|ES	2.03282	7.93663	1.07706	58.4832	0.0420711
CDYL|75229|AP	-2.03142	0.0597335	0.0039399	0.905629	0.0422119
LYNX1|85361|AP	-2.03115	0.368388	0.140544	0.965607	0.0422398
CTDNEP1|38878|AP	2.03077	12.063	1.0907	133.416	0.0422788
ZNF706|84738|AT	-2.02615	0.00174933	3.76531e-06	0.812719	0.0427498
FYN|77271|AP	-2.02481	0.0110764	0.000141717	0.865714	0.0428873
PIGK|3520|ES	-2.02342	2.49721e-10	1.24755e-19	0.499867	0.0430298
FXYD3|102077|ES	2.01592	19.2141	1.0855	340.102	0.0438083
CCNC|77075|AT	2.01436	1.13017e+06	1.45696	8.76675e+11	0.0439722
LETMD1|21760|ES	-2.01389	0.157976	0.0262204	0.951786	0.0440208
CALCOCO2|42231|ES	-2.0138	0.114198	0.01382	0.943647	0.0440309
TRIQK|84493|ES	-2.01221	0.0852847	0.00775359	0.938079	0.0441975
KPTN|50650|ES	-2.00863	0.000488173	2.8667e-07	0.831315	0.0445761
GGT1|61430|AP	2.00669	3.19211	1.0274	9.91782	0.0447822
DNAJC19|67760|ES	2.00409	157.248	1.1178	22121	0.0450603
GLYCTK|65211|ES	2.00328	4.48894	1.033	19.5068	0.0451468
MAP4|64551|AA	2.00232	3873.68	1.19099	1.25991e+07	0.04525
RHBDL2|1863|AT	1.99651	6.84962e+34	4.34128	1.08073e+69	0.0458787
UHRF1BP1|75792|AT	-1.99578	0.00221404	5.47037e-06	0.896093	0.0459576
DNAJC17|30045|AD	-1.99321	3.29131e-05	1.28681e-09	0.841826	0.046238
TMPRSS4|18957|ES	1.98987	1.34084e+07	1.27968	140491552123200	0.0466058
TIPRL|8901|AT	1.98952	552.797	1.09837	278217	0.0466435
TMEM68|83869|AT	-1.98948	0.000224197	5.69387e-08	0.882779	0.0466479
NOP16|117546|AA	-1.98931	0.00688147	5.09636e-05	0.929184	0.046667
ZNF782|86982|AP	1.98919	19.9169	1.04493	379.626	0.0466804
S100PBP|1638|AD	1.98839	27.2885	1.0484	710.284	0.046769
ZNF551|52325|AT	-1.9877	0.0862344	0.00769505	0.966384	0.0468451
TMCO1|8806|AP	1.98757	102.691	1.06646	9888.22	0.0468587
NPIPA7|34234|AT	1.9859	14.2932	1.03535	197.322	0.0470445
LYRM5|20809|AT	1.98122	29.8201	1.03709	857.436	0.0475672
CUL2|11218|AP	1.98008	76.2959	1.04503	5570.25	0.0476942
MCTS1|90006|AP	1.97525	1.63857e+07	1.1372	236099928791707	0.0482396
NME4|32874|AP	-1.97283	0.038226	0.00149267	0.978936	0.0485148
SLC25A19|43428|AP	1.97277	29.3621	1.02218	843.427	0.0485221
PMM2|33931|ES	1.97018	132776	1.06306	1.65835e+10	0.048818
TCN2|61788|AA	-1.96672	9.72131e-05	9.75506e-09	0.968767	0.0492156
